# Supplementary material for: Decreased Levels of Thioredoxin o1 Influences Stomatal Development and Aperture but Not Photosynthesis under Non-Stress and Saline Conditions
Source: MDPI journal article supplement (doi:10.3390/ijms22031063), 2021-01-21
Supplement: s1 [file s1]

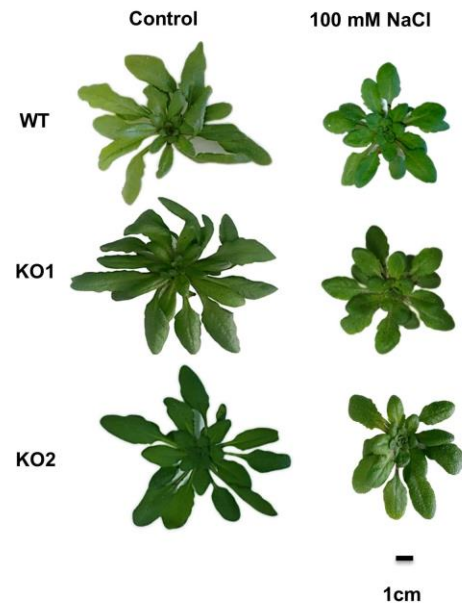

**Figure S1.** Arabidopsis plants of 33 days old representative of the genotypes WT and two KO *Attrxo1* lines grown in the absence (Control) and presence of 100 mM NaCl for 21 days.
