# Supplementary material for: Decreased Levels of Thioredoxin o1 Influences Stomatal Development and Aperture but Not Photosynthesis under Non-Stress and Saline Conditions
Source: MDPI journal article supplement (doi:10.3390/ijms22031063), 2021-01-21
Supplement: s1 [file s1]

**Supplementary Table 2. Percentage (%) of increase (↑) or decrease (↓) of different parameters in two *Attrxo1* mutant lines (KO1 and KO2) related to wild type (WT) values of plants grown in the absence (Control) and presence (100 mM) of NaCl. Results belong to similar parameters measured in the same lines but in different conditions: 150  $\mu\text{mol m}^{-2} \text{s}^{-1}$  PAR, long photoperiod (16 h light/8 h dark) as described in Calderón et al. (2018) [29] and 80  $\mu\text{mol m}^{-2} \text{s}^{-1}$  PAR, long photoperiod (16 h light/8 h dark) and grown in agar plates as reported in Sánchez-Guerrero et al. (2019) [10]. Only significant differences are presented when compared to WT in each condition ( $P < 0.05$ ) using the t-Student's test. ns: not significant.**

| CONTROL<br>CONDITION          | Present paper |        | Calderón et al.,<br>2018 |        | Sánchez-Guerrero<br>et al., 2019 |        |
|-------------------------------|---------------|--------|--------------------------|--------|----------------------------------|--------|
|                               | KO1           | KO2    | KO1                      | KO2    | KO1                              | KO2    |
| Rosette diameter              | ns            | ns     | ns                       | ns     | ↓ 11.3                           | ns     |
| Leaf number                   | ↑ 17.0        | ns     | ns                       | ns     | ns                               | ↑ 7.6  |
| Fresh weight                  | ns            | ns     | ns                       | ns     | ns                               | ↑ 59.0 |
| Total stomata/mm <sup>2</sup> | ns            | ns     | ↑ 47.7                   | ↑ 53.5 |                                  |        |
| Stomatal index                | ↑ 18.2        | ↑ 9.9  | ↓ 14.0                   | ↓ 8.0  |                                  |        |
| g <sub>s</sub>                | ↑ 27.3        | ↑ 20.3 | ns                       | ns     |                                  |        |
| NO                            | ns            | ns     | ↑ 25.1                   | ↑ 17.2 |                                  |        |
| H <sub>2</sub> O <sub>2</sub> | ns            | ns     | ns                       | ns     |                                  |        |
| Carbonyl proteins             | ↓ 67.0        | ↓ 50.0 | ↑ 17.6                   | ↑ 27.6 |                                  |        |
| MDA                           | ↑ 332         | ↑ 197  | ns                       | ns     |                                  |        |
| ASC                           | ns            | ns     | ns                       | ns     |                                  |        |
| GSH                           | ns            | ns     | ns                       | ns     |                                  |        |
| GSSG                          | ns            | ns     | ns                       | ns     |                                  |        |
| GSNO                          | ns            | ↑ 21.0 | ns                       | ns     |                                  |        |
| <hr/>                         |               |        |                          |        |                                  |        |
| 100 mM NaCl                   | KO1           | KO2    | KO1                      | KO2    | KO1                              | KO2    |
| Rosette diameter              | ns            | ns     | ns                       | ns     | ↓ 4.8                            | ↓ 20.5 |
| Leaf number                   | ns            | ns     | ns                       | ns     | ns                               | ↑ 5.7  |
| Fresh weight                  | ns            | ns     | ns                       | ns     | ns                               | ns     |
| Total stomata/mm <sup>2</sup> | ↑ 31.3        | ns     | ↑ 14.4                   | ns     |                                  |        |
| Stomatal index                | ns            | ns     | ↓ 6.7                    | ↓ 11   |                                  |        |
| Stomatal conductance          | ↑ 65          | ↑ 137  | ns                       | ns     |                                  |        |
| NO                            | ↑ 48.3        | ↑ 33   | ↑ 8.3                    | ns     |                                  |        |
| H <sub>2</sub> O <sub>2</sub> | ns            | ns     | ↑ 23.4                   | ↑ 15.5 |                                  |        |
| Carbonyl proteins             | ↓ 54.0        | ↓ 70.0 | ns                       | ns     |                                  |        |
| MDA                           | ns            | ns     | ↑ 53.5                   | ↑ 43.9 |                                  |        |
| ASC                           | ↑ 59.0        | ↑ 32.0 | ↑ 21.1                   | ns     |                                  |        |
| GSH                           | ns            | ns     | ↓ 19.0                   | ns     |                                  |        |
| GSSG                          | ns            | ns     | ↓ 21.0                   | ns     |                                  |        |
| GSNO                          | ns            | ns     | ns                       | ns     |                                  |        |
