# Supplementary material for: Decreased Levels of Thioredoxin o1 Influences Stomatal Development and Aperture but Not Photosynthesis under Non-Stress and Saline Conditions
Source: MDPI journal article supplement (doi:10.3390/ijms22031063), 2021-01-21
Supplement: s1 [file s1]

**Supplementary Table 1. Relative levels of metabolites in leaves of *A. thaliana* wild type (WT), and two *KO Attrxo1* mutant lines grown under control (C) conditions and in the presence of 100 mM of NaCl (S).** The values represent the standard mean error of 6 standardized biological samples to the mean value in the WT in each condition. Numbers in bold indicate significant differences (P<0.05) with respect to the control status of each genotype and asterisks indicate significant differences (P<0.05) relative to the WT in each condition using the t-Student's test.

| Metabolite         | WT C          | KO1 C            | KO2 C             | WT S              | KO1 S             | KO2 S             |
|--------------------|---------------|------------------|-------------------|-------------------|-------------------|-------------------|
| Alanine            | 1±0.05        | 1.13±0.06        | 0.97±0.01         | <b>1.98±0.18</b>  | <b>2.25±0.05</b>  | <b>2.17±0.05</b>  |
| Asparagine         | 1±0.15        | 0.61±0.16*       | 0.48±0.02*        | 0.93±0.18         | 0.64±0.03         | 0.59±0.03         |
| Aspartate          | 1±0.09        | 0.88±0.1         | 0.77±0.05         | 1.22±0.21         | 0.96±0.15         | 1.00±0.06         |
| beta-alanine       | 1±0.09        | 0.95±0.03        | 0.93±0.07         | <b>4.63±0.35</b>  | <b>4.26±0.15</b>  | <b>4.18±0.11</b>  |
| Phenylalanine      | 1±0.15        | 0.66±0.04*       | 0.66±0.05*        | <b>1.58±0.19</b>  | <b>1.65±0.08</b>  | <b>1.70±0.01</b>  |
| Glutamate          | 1±0.06        | 0.88±0.11        | 0.84±0.08         | <b>1.47±0.20</b>  | <b>1.20±0.18</b>  | <b>1.19±0.19</b>  |
| Glutamine          | 1±0.15        | 0.61±0.10        | 0.58±0.07         | 0.86±0.11         | 0.77±0.15         | 0.71±0.20         |
| Glycine            | 1±0.09        | 0.76±0.11        | 0.72±0.06         | <b>0.19±0.01</b>  | <b>0.24±0.02</b>  | <b>0.23±0.04</b>  |
| Isoleucine         | 1±0.14        | 0.74±0.03        | 0.68±0.01         | <b>2.20±0.22</b>  | <b>2.71±0.15</b>  | <b>2.66±0.16</b>  |
| Lysine             | 1±0.11        | 0.78±0.02        | 0.72±0.03         | <b>2.46±0.36</b>  | <b>2.77±0.24</b>  | <b>2.68±0.03</b>  |
| Ornithine          | 1±0.11        | 0.57±0.06*       | 0.55±0.05*        | 1.01±0.12         | <b>0.86±0.05</b>  | <b>0.87±0.14</b>  |
| Proline            | 1±0.34        | 1.23±0.34        | 1.10±0.21         | <b>93.70±3.10</b> | <b>66.26±8.18</b> | <b>63.42±6.20</b> |
| Serine             | 1±0.02        | 0.89±0.04        | 0.83±0.03*        | <b>2.53±0.21</b>  | <b>2.20±0.11</b>  | <b>2.25±0.09</b>  |
| Tyrosine           | 1±0.17        | 0.74 ±0.02       | 0.86±0.01         | 1.79±0.36         | <b>2.01±0.23</b>  | <b>2.00±0.26</b>  |
| Threonine          | 1±0.02        | 0.83±0.04        | 0.70±0.02         | <b>2.85±0.19</b>  | <b>2.71±0.11</b>  | <b>2.67±0.24</b>  |
| Valine             | 1±0.08        | 0.81±0.04        | 0.55±0.03         | <b>2.36± .24</b>  | <b>2.73±0.12</b>  | <b>2.79±0.27</b>  |
| Threonate          | 1±0.07        | 0.90±0.08        | 0.91±0.05         | 1.06±0.17         | 0.86±0.09         | 0.87±0.08         |
| Dehydroascorbate   | 1±0.24        | 1.12±0.10        | 1.10±0.23         | 1.74±0.23         | <b>2.36±0.18</b>  | <b>1.92±0.21</b>  |
| Fumarate           | 1±0.10        | 1.52±0.21*       | 1.92±0.33*        | <b>0.68±0.08</b>  | <b>0.53±0.04</b>  | <b>0.61±0.31</b>  |
| GABA               | 1±0.08        | 3.14±0.39*       | 2.86±0.31*        | 1.11±0.04         | <b>1.06±0.10</b>  | <b>1.14±0.26</b>  |
| Malate             | 1±0.19        | 1.34±0.12        | 1.39±0.22         | 1.18±0.25         | <b>0.82±0.13</b>  | <b>0.81±0.11</b>  |
| Phosphoric acid    | 1±0.15        | 1.11±0.12        | 1.09±0.15         | <b>0.36±0.07</b>  | <b>0.49±0.08</b>  | <b>0.46±0.07</b>  |
| Citrate            | 1±0.27        | 1.47±0.18        | 1.52±0.22         | 0.54±0.08         | <b>0.49±0.10</b>  | <b>0.51±0.12</b>  |
| Succinate          | 1±0.06        | 1.13±0.11        | 1.25±0.43         | <b>0.71±0.09</b>  | <b>0.55±0.06</b>  | <b>0.64±0.02</b>  |
| Pyruvate           | 1±0.10        | 0.80±0.06        | 0.70±0.03         | 1.09±0.07         | <b>1.12±0.05</b>  | <b>1.09±0.09</b>  |
| Erythritol         | 1±0.07        | 1.05±0.07        | 1.04±0.06         | <b>1.80±0.17</b>  | <b>1.92±0.16</b>  | <b>1.86±0.32</b>  |
| Maltose            | 1±0.05        | 2.33±0.34*       | 1.59±0.45*        | <b>0.60±0.03</b>  | <b>0.49±0.02</b>  | <b>0.19±0.05</b>  |
| Galactinol         | 1±0.07        | 1.99±0.14        | 1.95±0.11         | <b>20.11±3.53</b> | <b>19.16±2.68</b> | <b>18.9±1.96</b>  |
| Raffinose          | 1±0.27        | 1.51±0.17        | 1.40±0.12         | <b>38.59±8.24</b> | <b>50.21±6.07</b> | <b>45.6±3.40</b>  |
| Glucose            | 1±0.09        | 1.56±0.20*       | 1.57±0.18*        | <b>1.53±0.09</b>  | 1.18±0.05*        | 1.34±0.08*        |
| myo-inositol       | 1±0.08        | 1.43±0.12*       | 1.45±0.11*        | <b>3.97±0.20</b>  | <b>3.84±0.35</b>  | <b>4.78±0.13</b>  |
| Xylose             | 1±0.11        | 1.08±0.03        | 1.00±0.05         | <b>2.04±0.17</b>  | <b>2.00±0.10</b>  | <b>1.96±0.09</b>  |
| Sucrose            | 1±0.16        | 1.26±0.12        | 1.24±0.03         | <b>4.00±0.40</b>  | <b>3.94±0.32</b>  | <b>4.09±0.46</b>  |
| Fucose             | <b>1±0.05</b> | <b>0.98±0.04</b> | <b>1.01±0.12</b>  | <b>1.34±0.8</b>   | <b>1.14±0.05</b>  | <b>1.06±0.09</b>  |
| Fructose           | <b>1±0.19</b> | <b>1.50±0.21</b> | <b>1.90±0.03*</b> | <b>1.31±0.12</b>  | <b>0.61±0.05*</b> | <b>0.81±0.03*</b> |
| Galactose /Mannose | <b>1±0.13</b> | <b>1.22±0.09</b> | <b>1.19±0.07</b>  | <b>3.43±0.51</b>  | <b>2.71±0.17</b>  | <b>2.83±0.29</b>  |
| Glycerol           | <b>1±0.05</b> | <b>1.06±0.13</b> | <b>1.10±0.15</b>  | <b>2.19±0.39</b>  | <b>1.87±0.17</b>  | <b>1.92±0.17</b>  |
| Trehalose          | 1±0.06        | 1.13±0.13        | 1.09±0.11         | 1.52±0.29         | <b>2.51±0.22*</b> | <b>2.32±0.26*</b> |
| 4-OH-Proline       | 1±0.13        | 0.85±0.04        | 0.77±0.08         | <b>6.10±0.52</b>  | <b>5.58±0.33</b>  | <b>5.68±0.51</b>  |
| Spermidine         | 1±0.16        | 0.95±0.13        | 0.89±0.09         | <b>2.06±0.13</b>  | <b>2.27±0.10</b>  | <b>2.16±0.09</b>  |
| Putrescine         | 1±0.07        | 0.74±0.05        | 0.70±0.10         | <b>3.20±0.45</b>  | <b>3.53±0.38</b>  | <b>3.30±0.46</b>  |
